# Supplementary material
Source: publisher figshare collection journal article supplement (https://acs.figshare.com/ndownloader/files/7825795)
Supplement: Supplementary file 1 [file 7825795]

## Supporting Information

### Molybdenum Carbide-Embedded Nitrogen-Doped Porous Carbon Nanosheets as Electrocatalysts for Water Splitting in Alkaline Media

*Chenbao Lu<sup>†,‡</sup>, Diana Tranca<sup>§</sup>, Jian Zhang<sup>§</sup>, Fermín Rodríguez-Hernández<sup>§,||,⊥</sup>,  
Yuezeng Su<sup>‡</sup>, Xiaodong Zhuang<sup>\*,†</sup>, Fan Zhang<sup>\*,†</sup>, Gotthard Seifert<sup>§</sup>, Xinliang  
Feng<sup>\*,†,§</sup>*

<sup>†</sup>School of Chemistry and Chemical Engineering, State Key Laboratory of Metal Matrix Composites, Shanghai Key Laboratory of Electrical Insulation and Thermal Ageing, Shanghai Jiao Tong University, 200240 Shanghai, P. R. China.

E-mail: zhuang@sjtu.edu.cn, fan-zhang@sjtu.edu.cn,

<sup>‡</sup>School of Electronic Information and Electrical Engineering, School of Aeronautics and Astronautics, Shanghai Jiao Tong University, 200240 Shanghai, P. R. China.

<sup>§</sup>Center for Advancing Electronics Dresden (cfaed) & Department of Chemistry and Food Chemistry, Technische Universität Dresden, Mommsenstrasse 4, 01062 Dresden, Germany.

E-mail: xinliang.feng@tu-dresden.de

<sup>||</sup>Theoretical Chemistry, Technische Universität Dresden, Mommsenstr. 13, Dresden 01062, Germany.

<sup>⊥</sup>DynAMoS (Dynamical processes in Atomic and Molecular Systems), Facultad de Física, Universidad de La Habana, San Lázaro y L, La Habana 10400, Cuba.

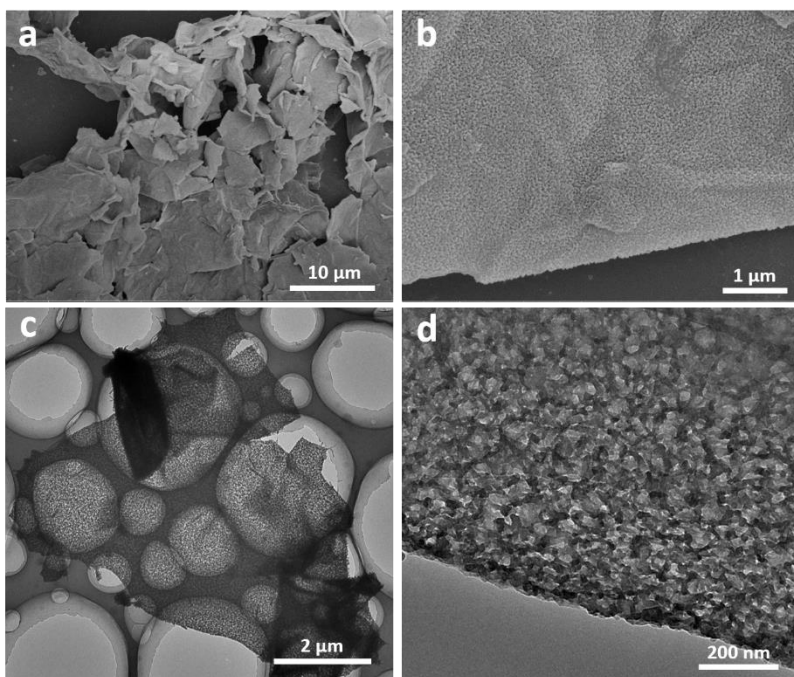

**Figure S1.** (a, b) SEM, (c, d) TEM images of Mo@2D-PANI; Many uniform nanosheets can be observed and no naked graphene nanosheets or free polyaniline nanofibers were observed, which indicates that most of the aniline monomers have been polymerized on the surface of graphene.

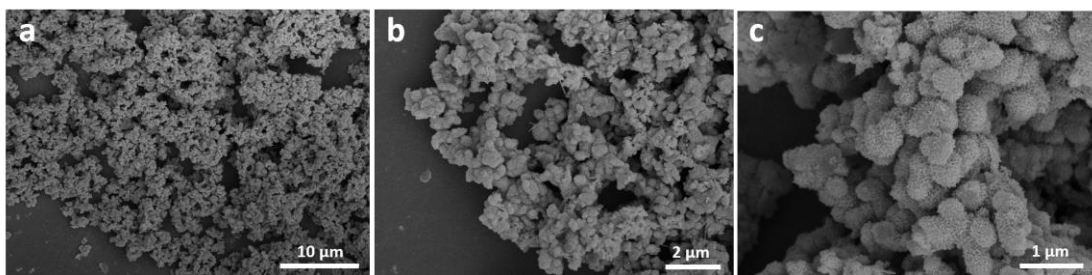

**Figure S2.** (a, b, and c) SEM images of Mo@PANI; the results indicate that the PANI tend to aggregation without GO.

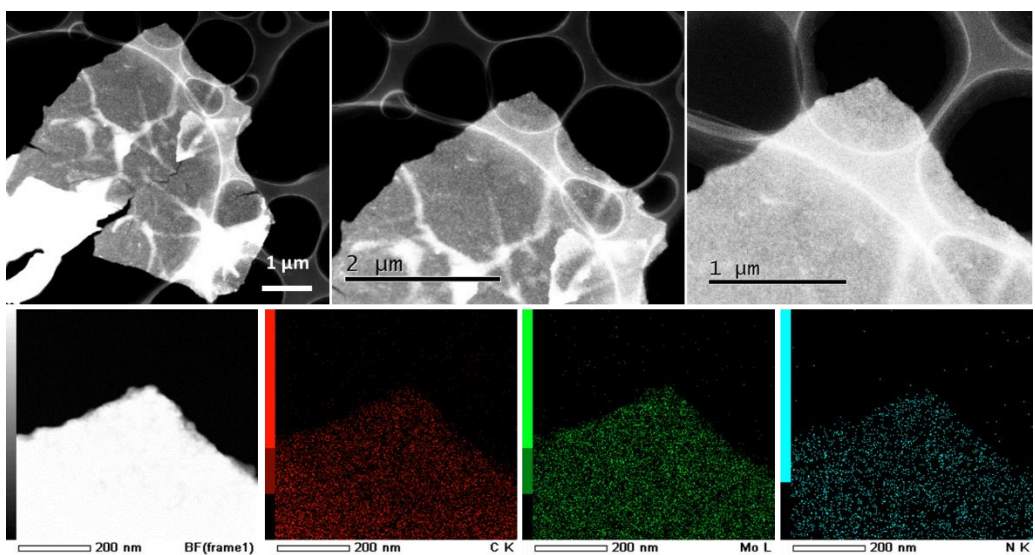

**Figure S3.** HAADF-STEM images and elemental mapping for Mo@2D-PANI, reveal the uniform distribution of Mo in the PANI nanosheets.

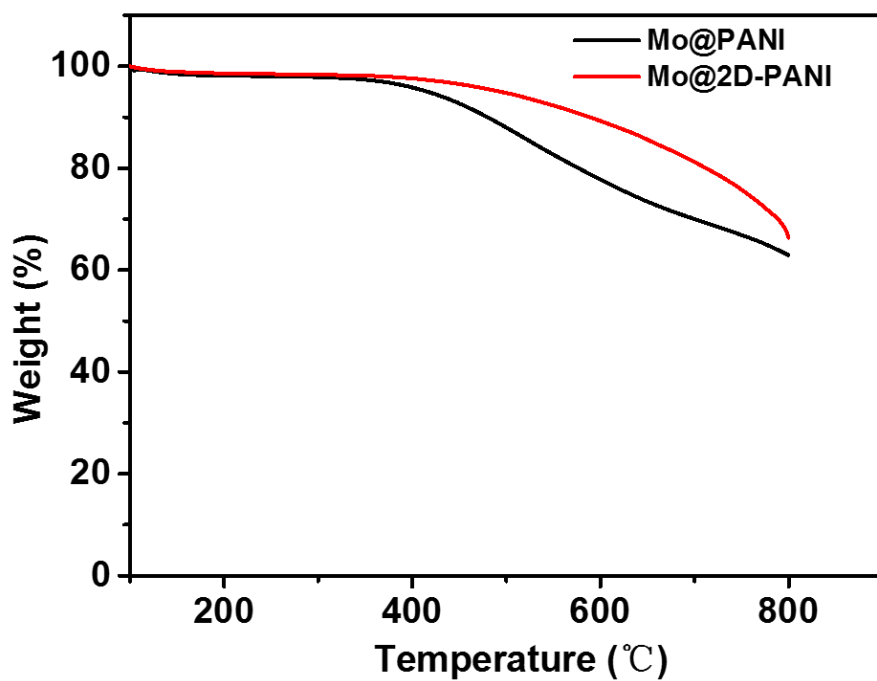

**Figure S4.** TGA curve of the as-prepared Mo@PANI and Mo@2D-PANI from 100 to 800 °C under N<sub>2</sub> gas flow with a temperature ramp of 5 °C min<sup>-1</sup>. The thermal property of these hybrids show that the decomposition reaction mainly occur at about 400 °C, and the remaining weight of samples after heating to 800 °C are about 65%.

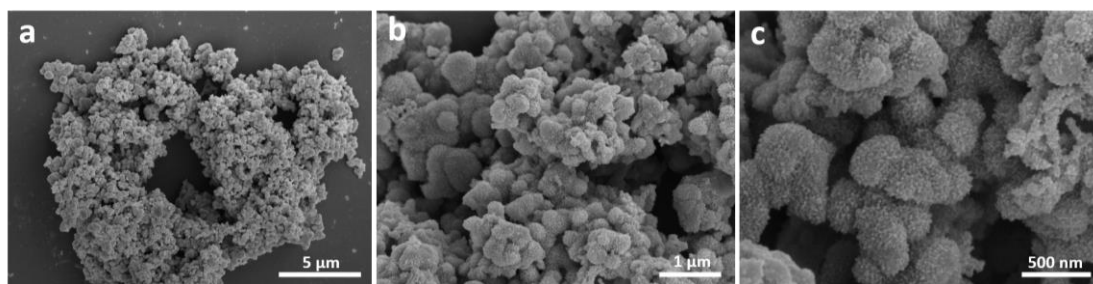

**Figure S5.** (a, b, and c) SEM images of Mo<sub>2</sub>C@NPC.

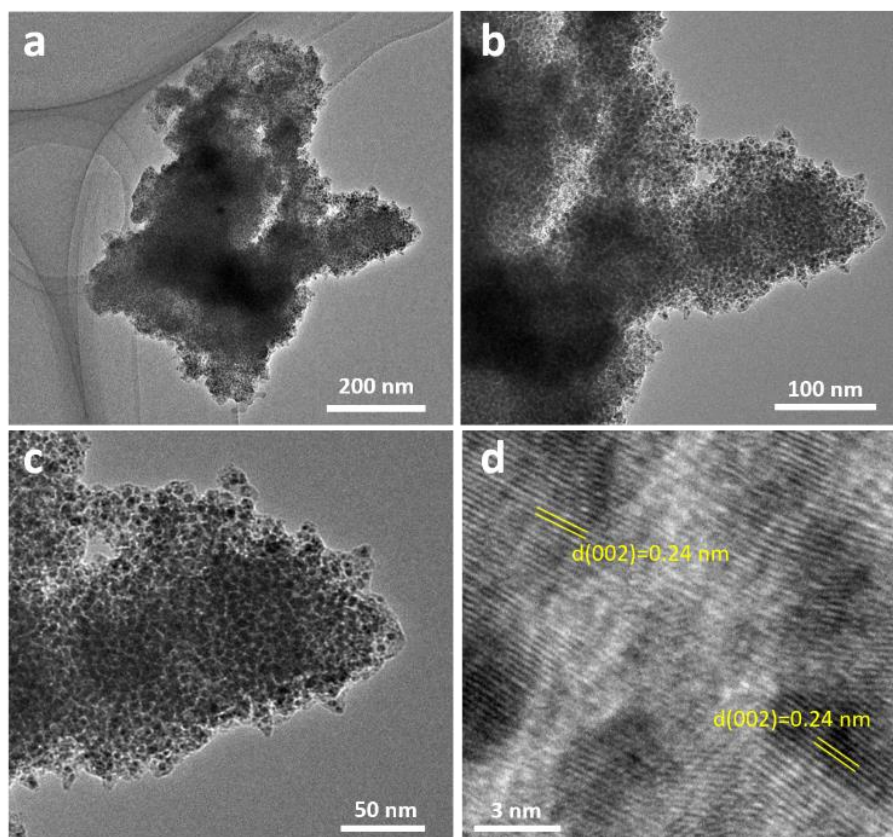

**Figure S6.** TEM images of Mo<sub>2</sub>C@NPC. HR-TEM image (d) shows clear lattice fringe with interplanar distance of 0.24 nm, which correspond to the (002) crystal planes of Mo<sub>2</sub>C nanoparticles. Figure S5 and S6 reveal that PANI tend to aggregation without GO, and then it tends to form large Mo<sub>2</sub>C nanoparticles after carbonized, which decrease the exposed active surface. Notably, using GO as the templates can effectively prevent the aggregation and overlapping growth of Mo<sub>2</sub>C nanoparticles.

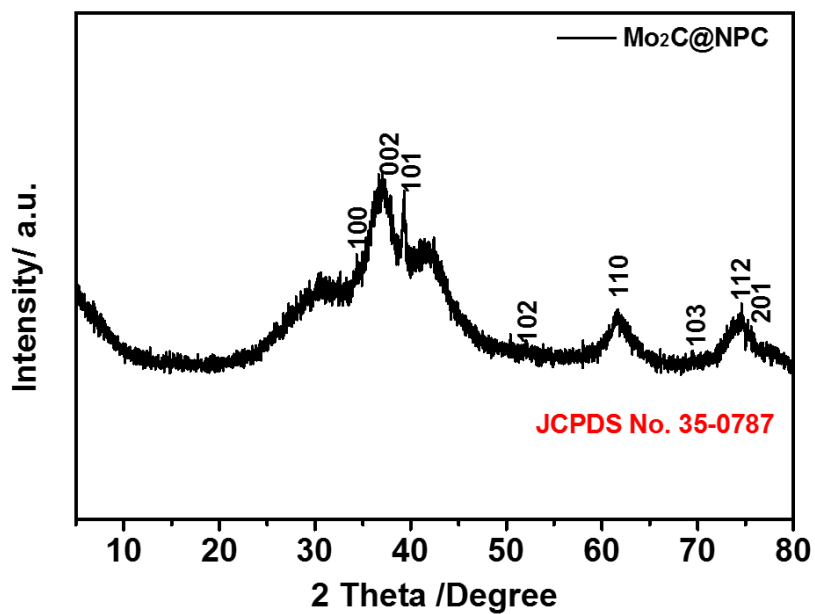

**Figure S7.** XRD patterns of Mo<sub>2</sub>C@NPC. All XRD peaks can be indexed to crystalline Mo<sub>2</sub>C (JCPDS No. 35-0787).

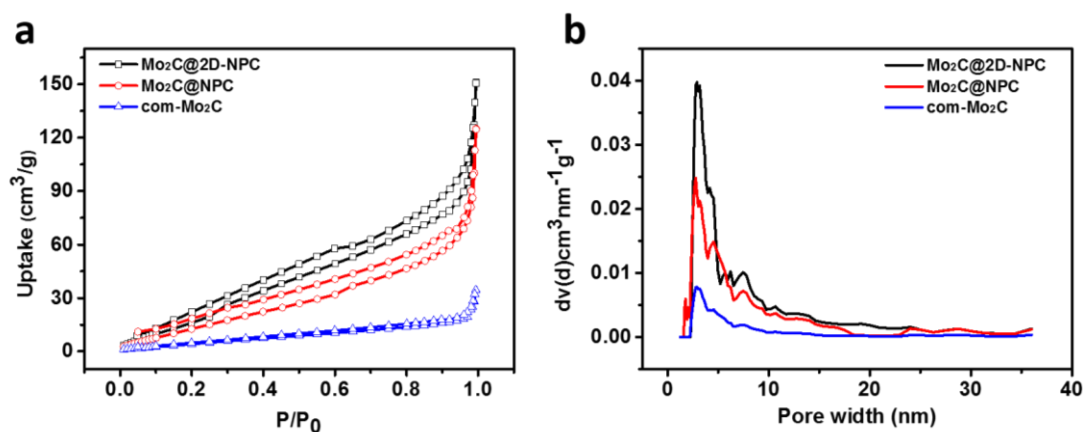

**Figure S8.** (a) N<sub>2</sub> sorption isotherms of Mo<sub>2</sub>C@2D-NPC, Mo<sub>2</sub>C@NPC, and com-Mo<sub>2</sub>C; (b) the pore size distribution calculated from NLDFT method. The pore diameter mainly centered between 2-10 nm.

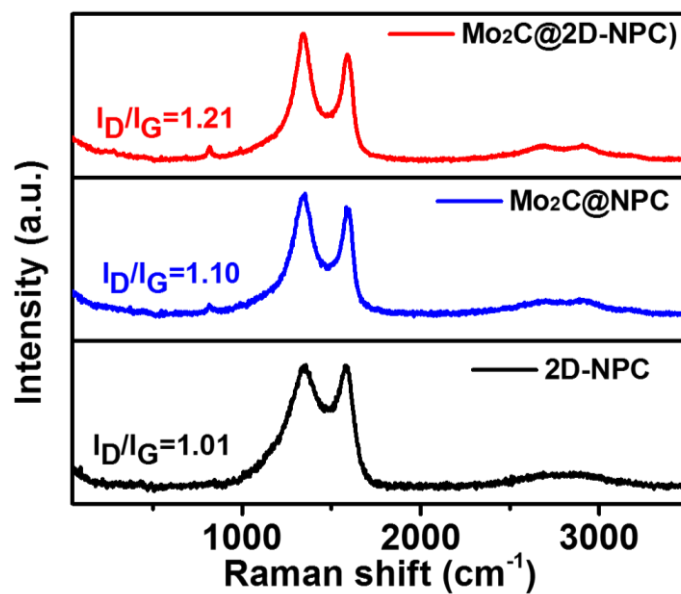

**Figure S9.** Raman spectra of Mo<sub>2</sub>C@2D-NPC (red), Mo<sub>2</sub>C@NPC (blue), and 2D-NPC (black). The  $I_D/I_G$  of Mo<sub>2</sub>C@2D-NPC is 1.21, which is higher than that of 2D-NPC (1.01) and Mo<sub>2</sub>C@NPC (1.10), suggesting more active defects in Mo<sub>2</sub>C@2D-NPC.

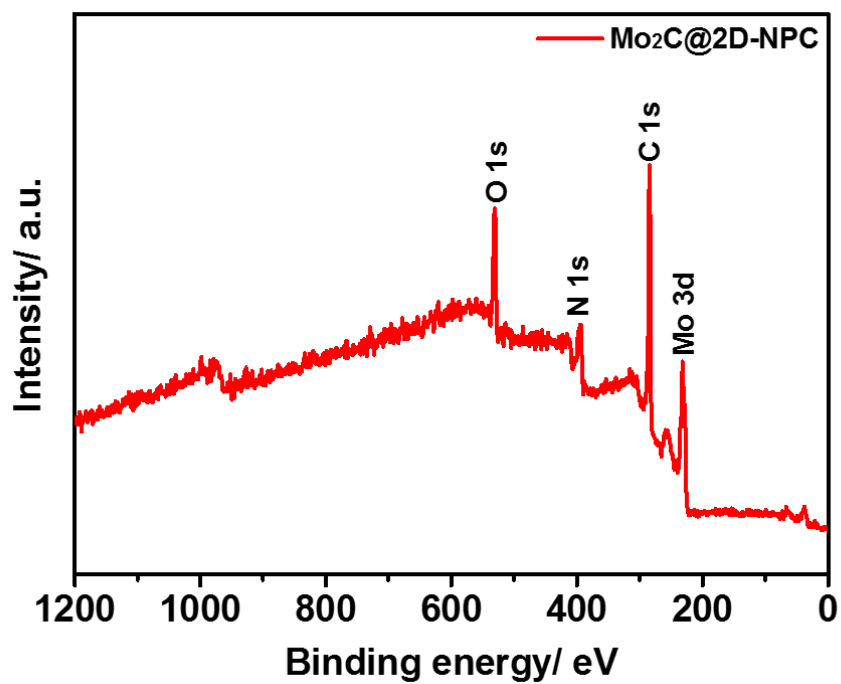

**Figure S10.** XPS spectrum of Mo<sub>2</sub>C@2D-NPC, demonstrates the existence of C, Mo, N and O elements.



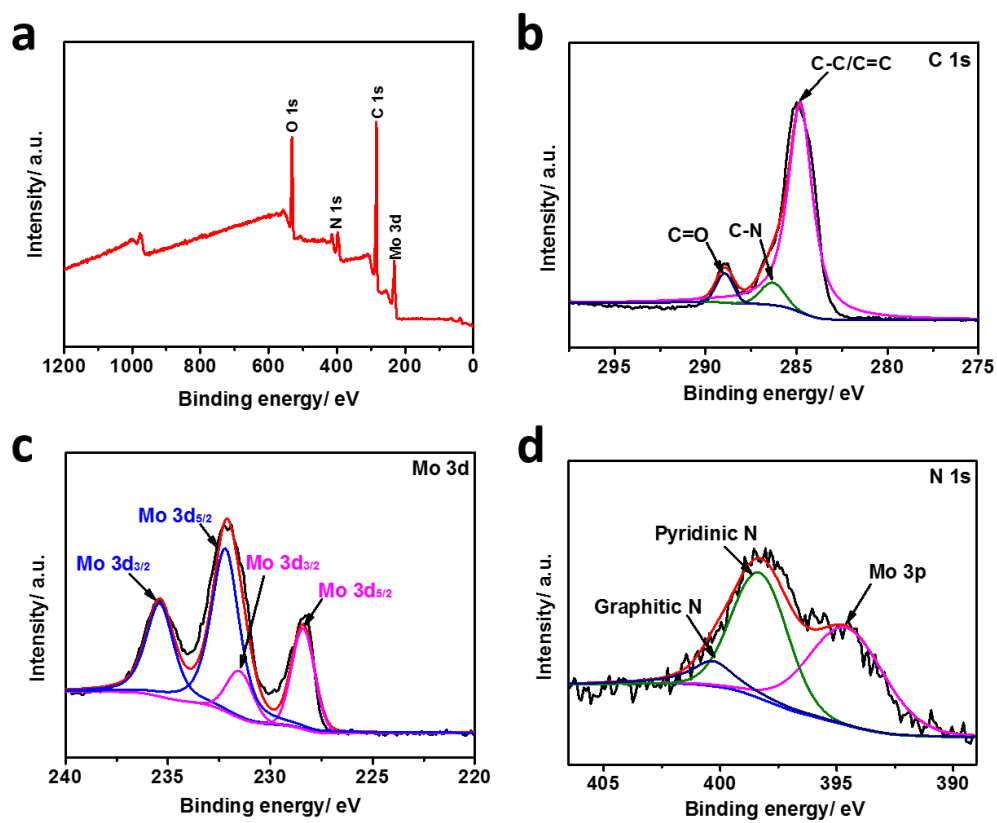

**Figure S11.** XPS spectrum of (a) Mo<sub>2</sub>C@NPC. High-resolution XPS spectra of (b) C 1s, (c) Mo 3d, (d) N 1s of Mo<sub>2</sub>C@NPC.

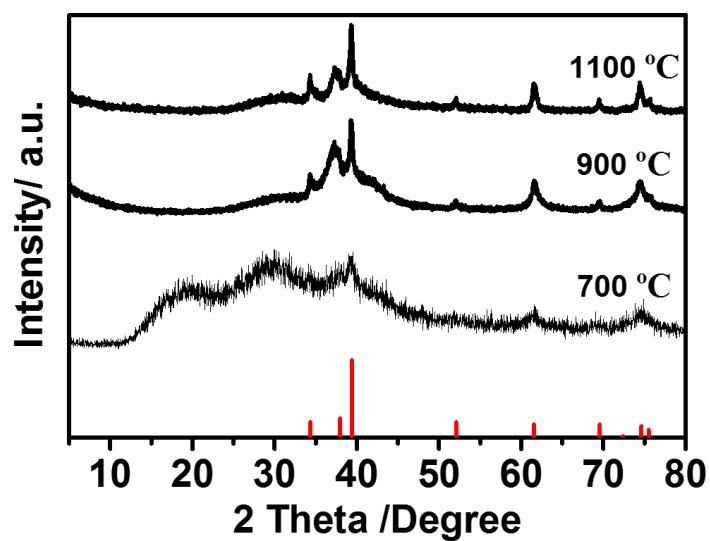

**Figure S12.** XRD patterns of  $\text{Mo}_2\text{C}@2\text{D-NPC}/700$ ,  $\text{Mo}_2\text{C}@2\text{D-NPC}$ , and  $\text{Mo}_2\text{C}@2\text{D-NPC}/1100$ . All XRD peaks can be indexed to crystalline  $\text{Mo}_2\text{C}$  (JCPDS No. 35-0787). The results reveal that when carbonization under 700 °C, it shows poor crystalline structure.

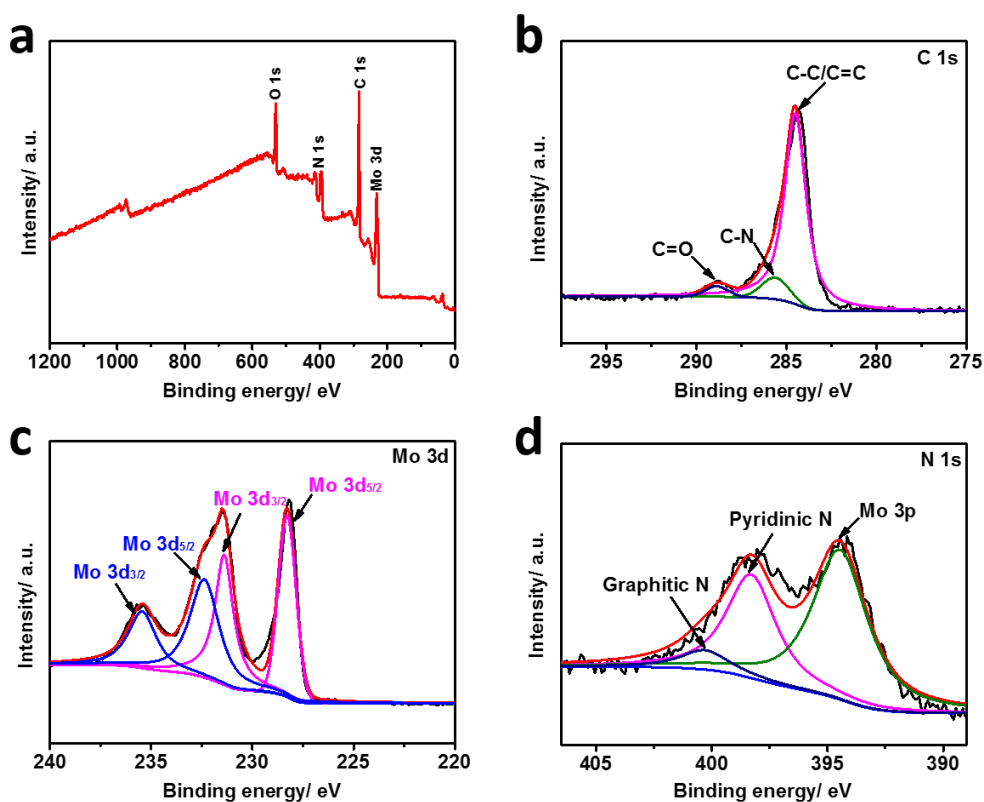

**Figure S13.** XPS spectrum of (a)  $\text{Mo}_2\text{C}@2\text{D-NPC}/700$ . High-resolution XPS spectra of (b) C 1s, (c) Mo 3d, (d) N 1s of  $\text{Mo}_2\text{C}@2\text{D-NPC}/700$ .

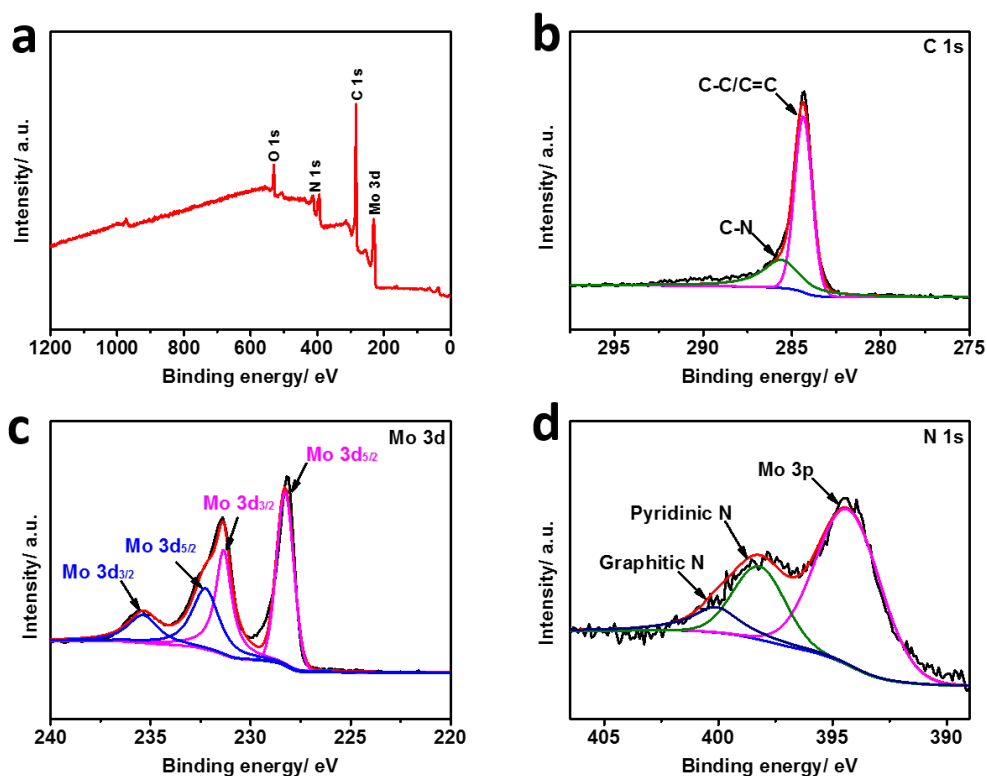

**Figure S14.** XPS spectrum of (a)  $\text{Mo}_2\text{C}@2\text{D-NPC}/1100$ . High-resolution XPS spectra of (b) C 1s, (c) Mo 3d, (d) N 1s of  $\text{Mo}_2\text{C}@2\text{D-NPC}/1100$ .

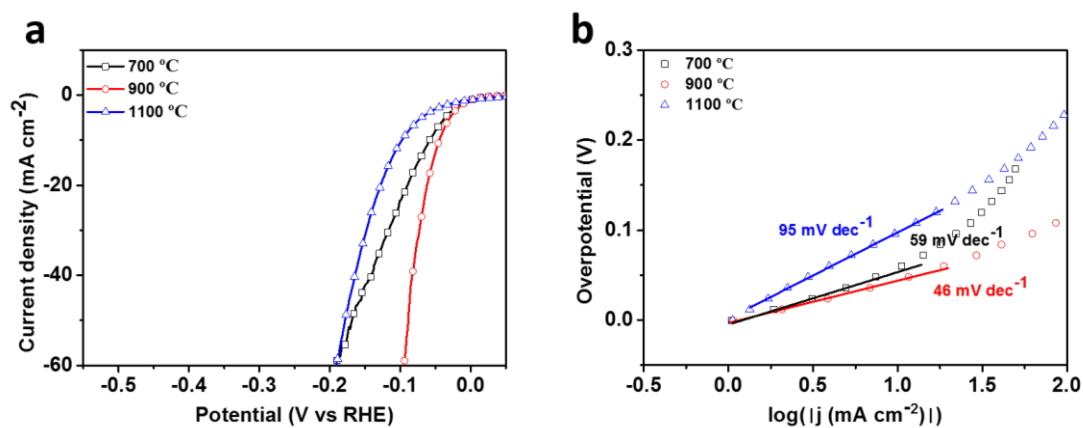

**Figure S15.** HER performance of  $\text{Mo}_2\text{C}@2\text{D-NPC}$  at different carbonization temperature in basic media. (a) Polarization curves and (b) corresponding Tafel plots of as-prepared materials in 1M KOH. This result indicate that the catalyst carbonized at 900 °C exhibited the best HER performance.

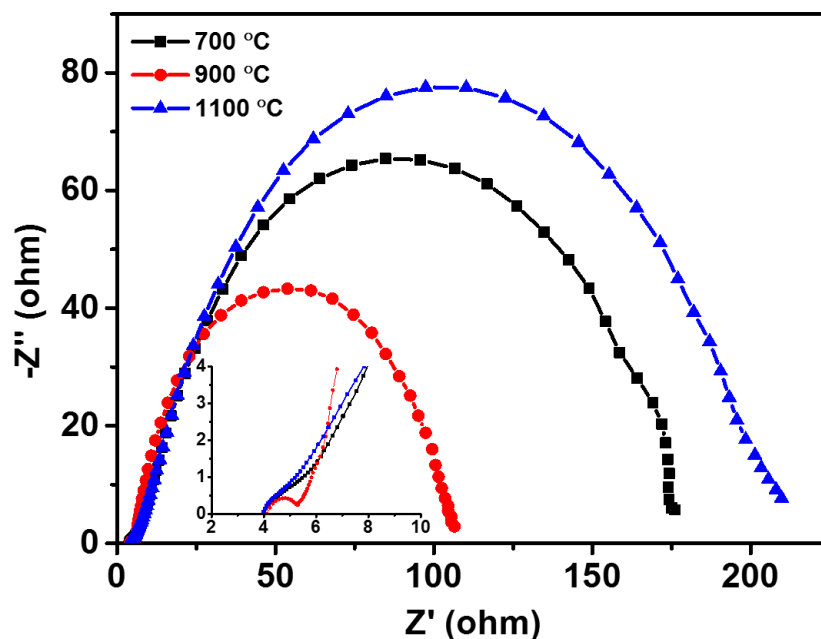

**Figure S16.** Nyquist plots of  $\text{Mo}_2\text{C}@2\text{D-NPC}$  at different carbonization temperature over the frequency range from 1000 kHz to 0.02 Hz at the open-circuit voltage with an AC voltage of 10 mV. Inset: the enlarged Nyquist plots in high frequency zone. Compared with the Nyquist plot of  $\text{Mo}_2\text{C}@2\text{D-NPC}/700$  and  $\text{Mo}_2\text{C}@2\text{D-NPC}/1100$ ,  $\text{Mo}_2\text{C}@2\text{D-NPC}$  shows a smaller semicircle, suggesting that the catalyst carbonized at 900 °C has lower impedance, which is benefit for the HER performance.

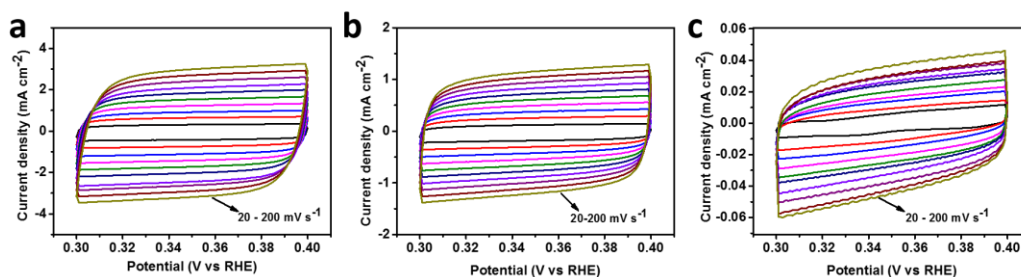

**Figure S17.** Cyclic voltammograms (CV) curves of (a)  $\text{Mo}_2\text{C}@2\text{D-NPC}$ , (b)  $\text{Mo}_2\text{C}@NPC$ , (c) com- $\text{Mo}_2\text{C}$  with different rates from 20 to 200  $\text{mV s}^{-1}$  in the region of 0.3 – 0.4 V vs RHE.

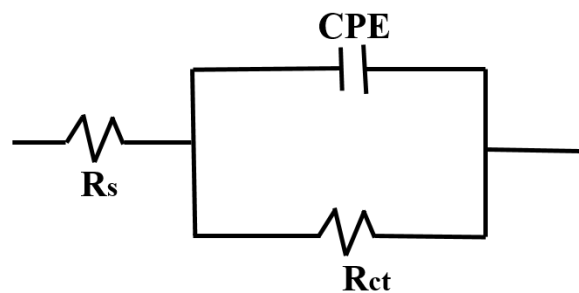

**Figure S18.** Equivalent circuit used for fitting of EIS data.  $R_s$  is the overall series resistance and  $R_{ct}$  is the charge transfer resistance,  $R_{ct}$  value generally varies inversely to the electrocatalytic activity. CPE is the constant phase angle element, which represents the double layer capacitance of solid electrode in the real-world situation.

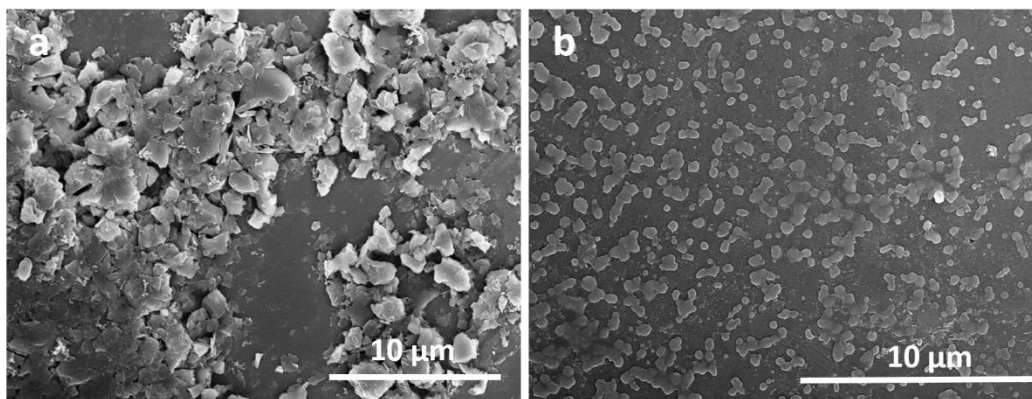

**Figure S19.** SEM image of com Mo<sub>2</sub>C before and after ball-milled. (a) SEM image of original com Mo<sub>2</sub>C, the com Mo<sub>2</sub>C show the micro size; (b) SEM image of ball-milled com Mo<sub>2</sub>C (bm-com Mo<sub>2</sub>C), we obtained the submicron bm-com Mo<sub>2</sub>C through the ball mill.

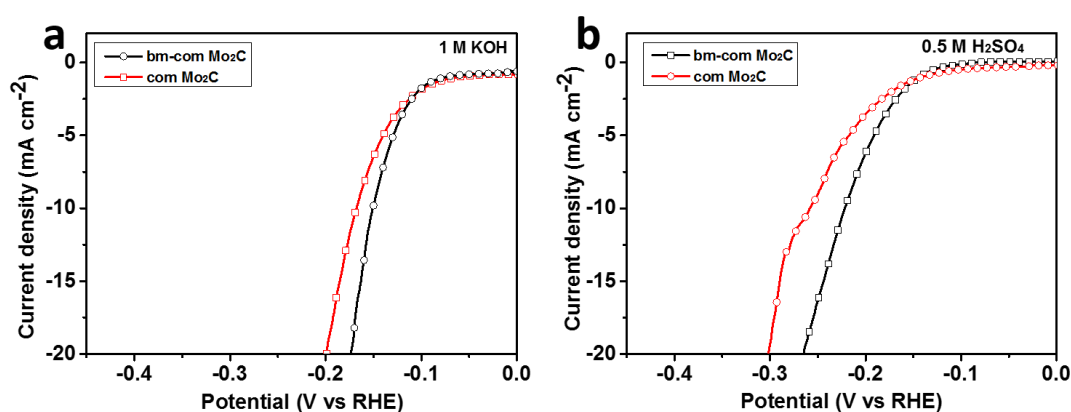

**Figure S20.** The performance contrast figure for the com Mo<sub>2</sub>C and bm-com Mo<sub>2</sub>C. (a) electrocatalysis HER performance of com Mo<sub>2</sub>C and bm-com Mo<sub>2</sub>C in 1 M KOH; (b) electrocatalysis HER performance of com Mo<sub>2</sub>C and bm-com Mo<sub>2</sub>C in 0.5 M H<sub>2</sub>SO<sub>4</sub>. It was found that no matter in alkaline or acid media, bm-com Mo<sub>2</sub>C exhibited better performance. That's because after ball milling, the initial bulk particles were crushed into submicron size with larger proportion of exposed basal planes. Moreover, during the ball milling, catalytically active sites can be created because of crystalline defects and discontinuities, which were benefit for electrocatalysis,<sup>1, 2</sup> but still far beyond the state-of-the-art results (Table S4 and S5).

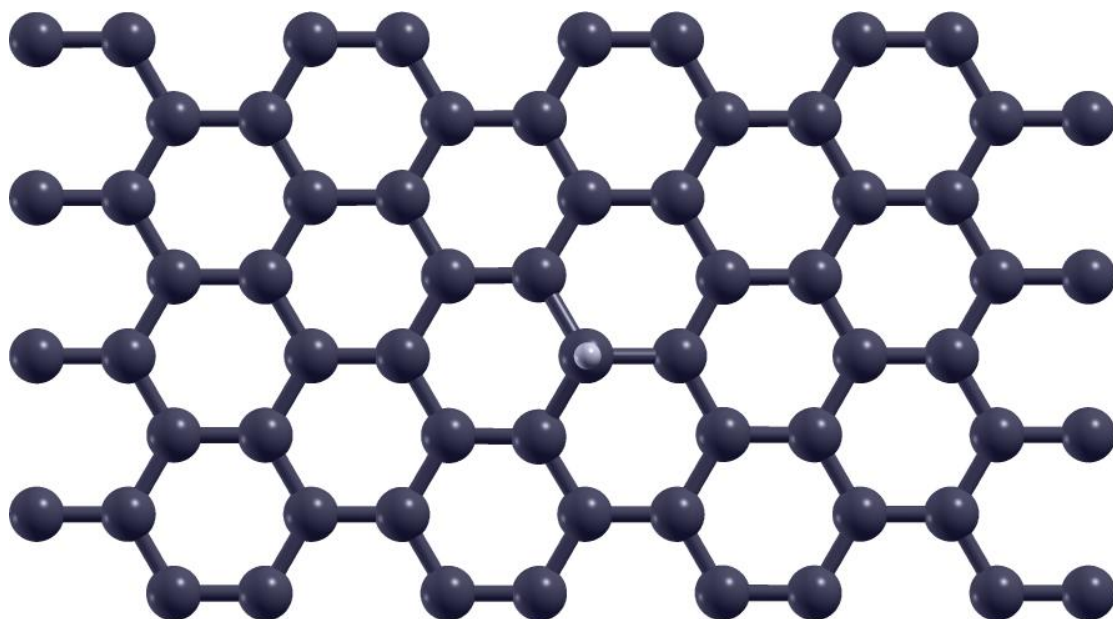

**Figure S21.** Hydrogen adsorbed on graphene (G) structure. A theoretical model description. The black and gray balls represent the C and H atoms.

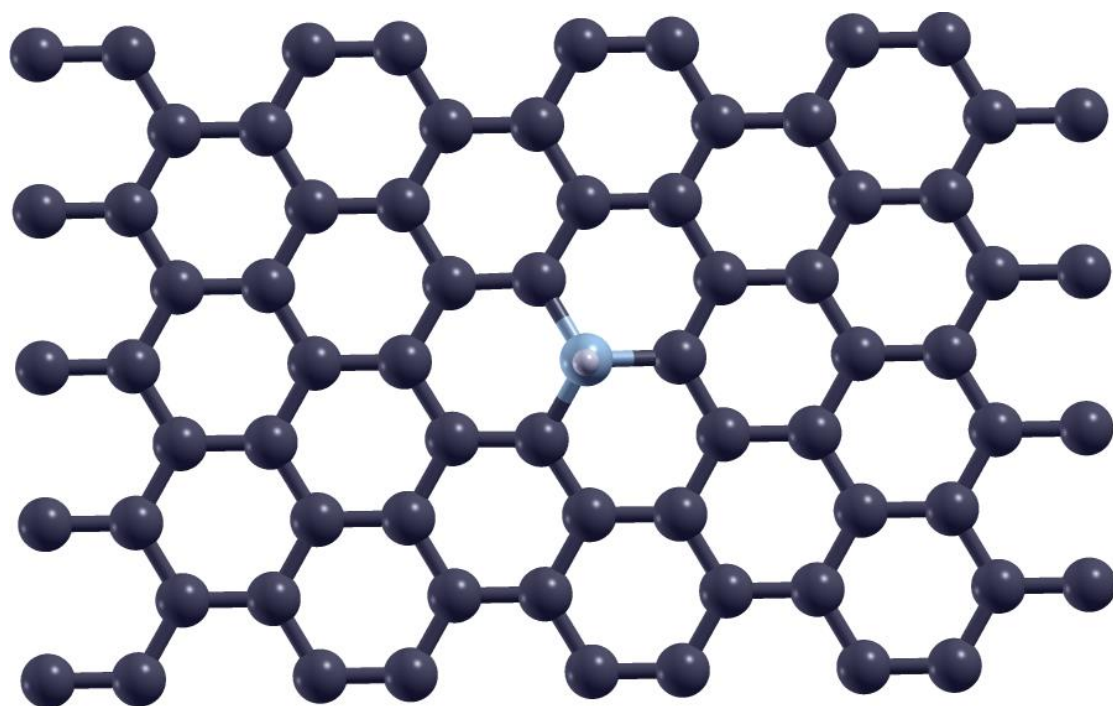

**Figure S22.** Hydrogen adsorbed on graphitic-N doped graphene (GN). A theoretical model description. The black, gray and cyan balls represent the C, H and N atoms.



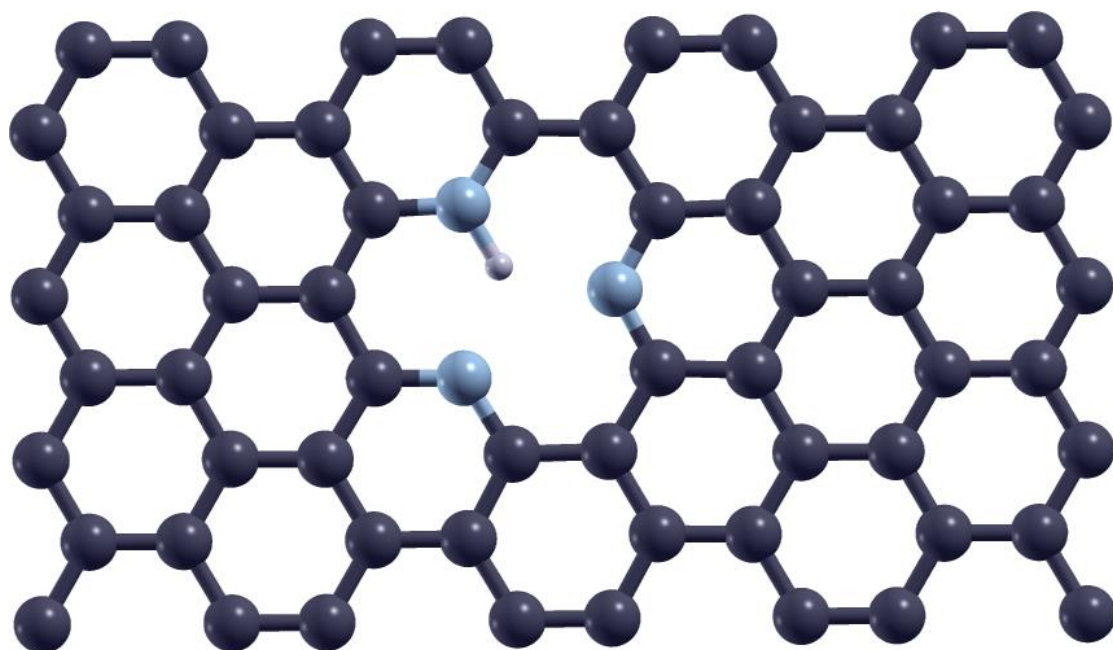

**Figure S23.** Hydrogen adsorbed on pyridinic-N doped graphene with one vacancy (Pyr.N3). A theoretical model description. The black, gray and cyan balls represent the C, H and N atoms.

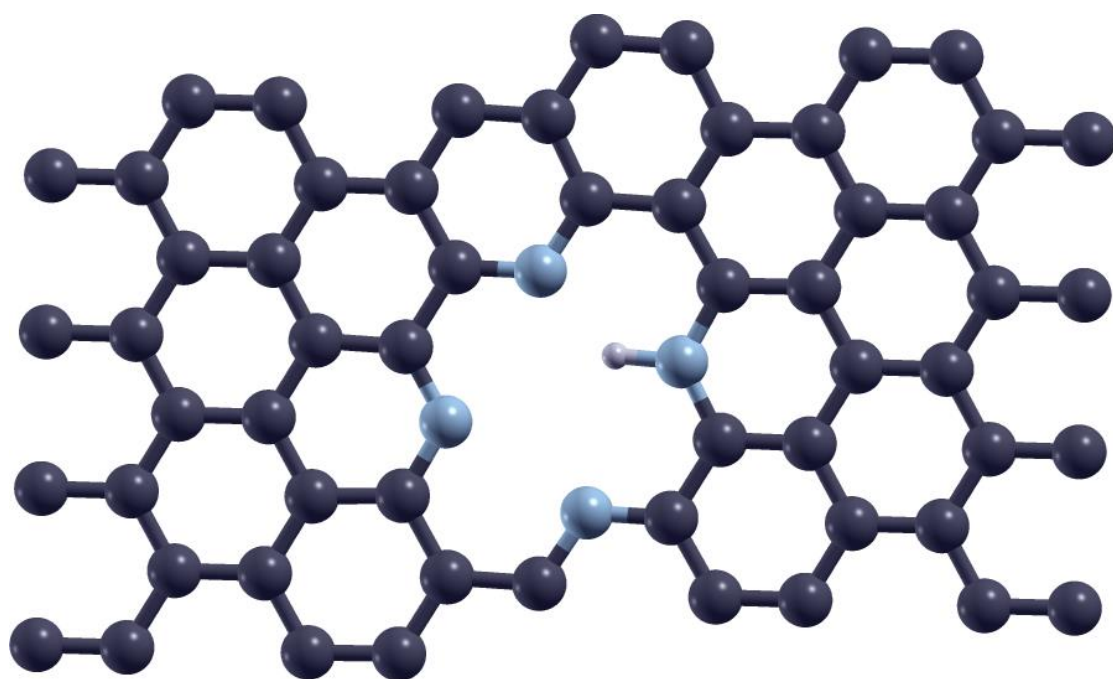

**Figure S24.** Hydrogen adsorbed on pyridinic-N doped graphene with two vacancies (Pyr.2VN3). A theoretical model description. The black, gray and cyan balls represent the C, H and N atoms.



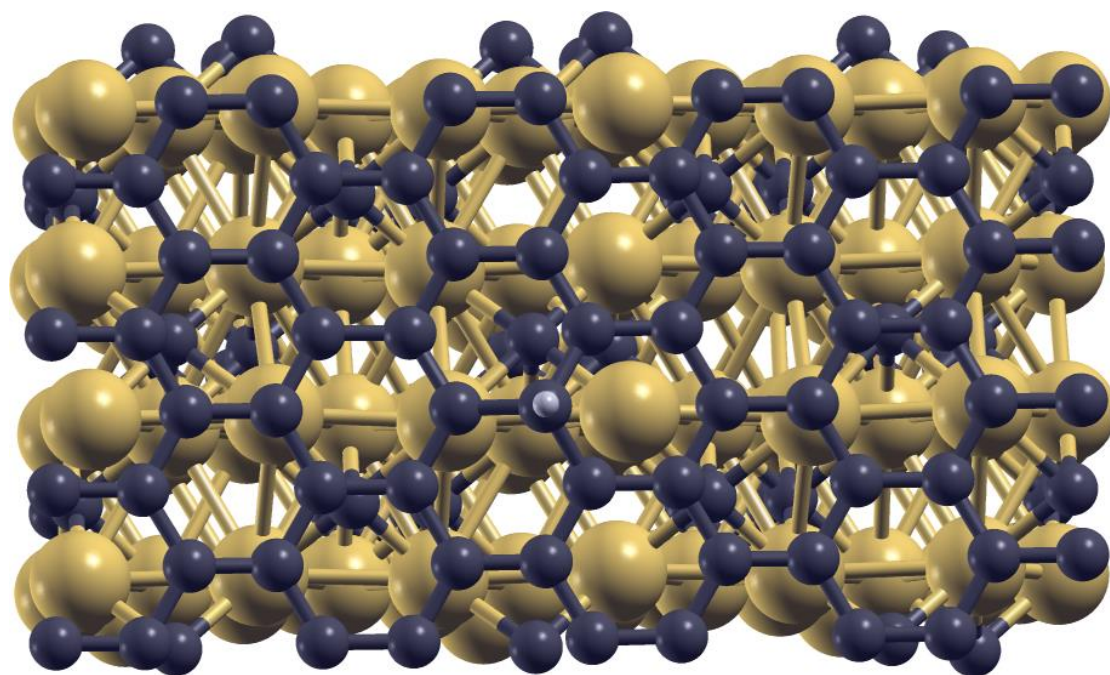

**Figure S25.** Hydrogen adsorbed on G@Mo<sub>2</sub>C. A theoretical model description. The black, gray and brown balls represent the C, H and Mo atoms.

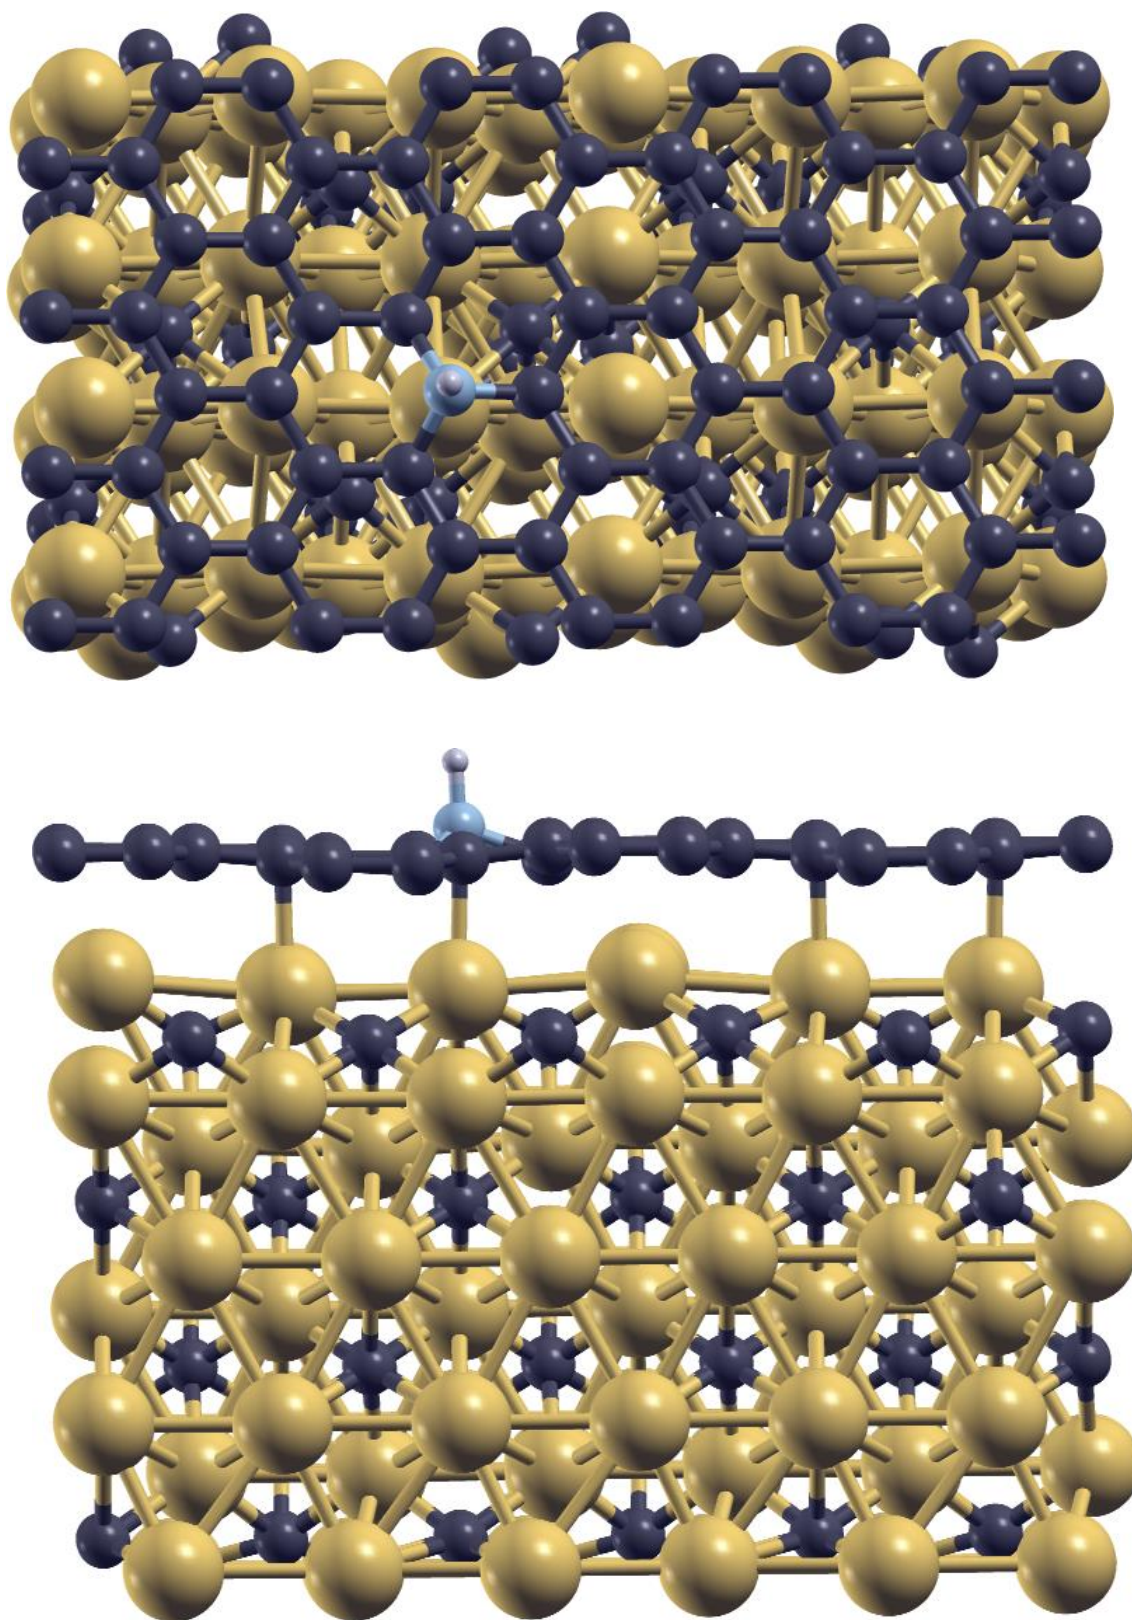

**Figure S26.** Hydrogen adsorbed on GN@Mo<sub>2</sub>C. A theoretical model description. The black, gray, cyan, and brown balls represent the C, H, N and Mo atoms.



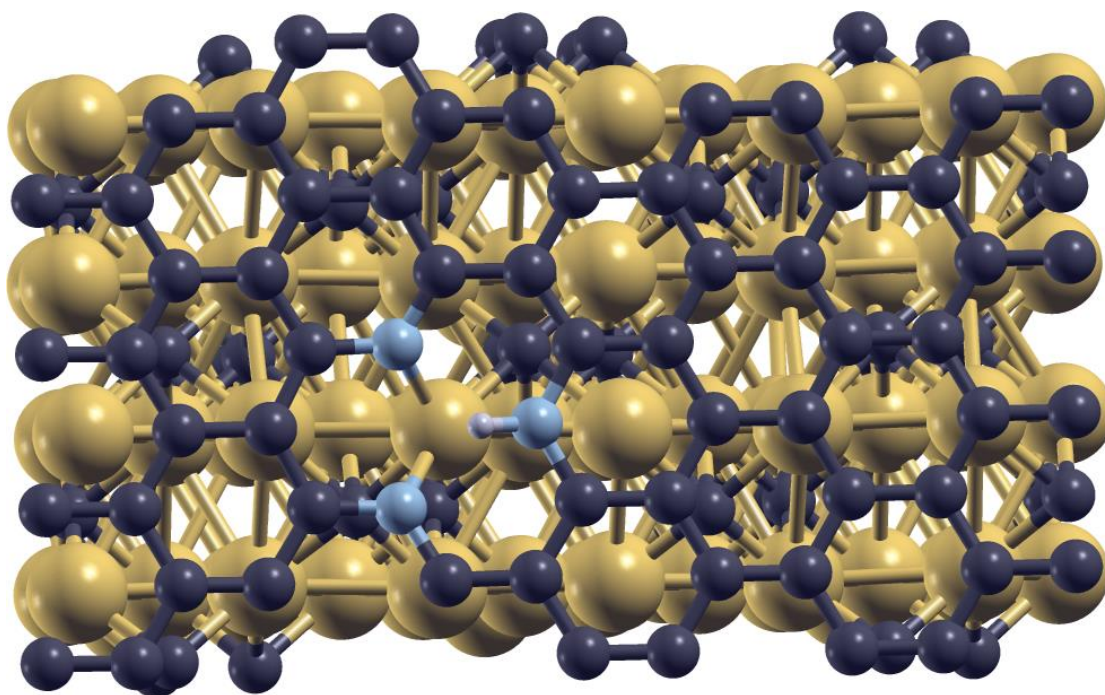

**Figure S27.** Hydrogen adsorbed on Pyr.N3@Mo<sub>2</sub>C. A theoretical model description. The black, gray, cyan, and brown balls represent the C, H, N and Mo atoms.

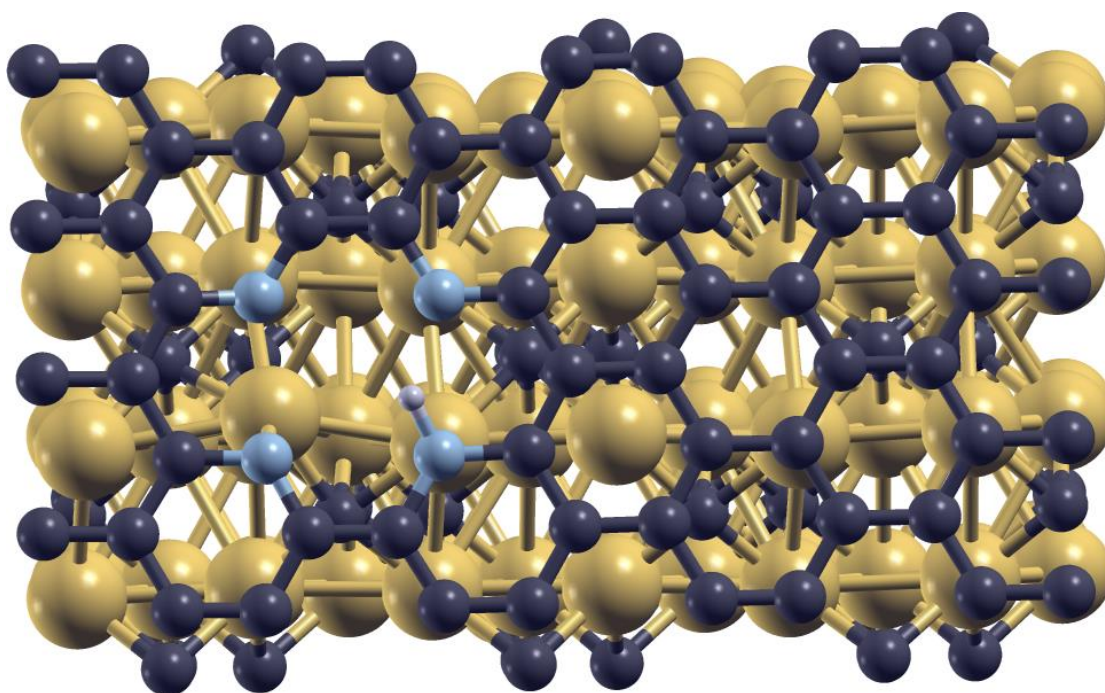

**Figure S28.** Hydrogen adsorbed on Pyr.2VN3@Mo<sub>2</sub>C. A theoretical model description. The black, gray, cyan and brown balls represent the C, H, N and Mo atoms.

**Table S1.** N<sub>2</sub> sorption data for Mo<sub>2</sub>C@2D-NPC, Mo<sub>2</sub>C@NPC, and com-Mo<sub>2</sub>C.

| sample                   | S <sub>BET</sub> / (m <sup>2</sup> g <sup>-1</sup> ) <sup>a</sup> | S <sub>Langmuir</sub> / (m <sup>2</sup> g <sup>-1</sup> ) <sup>b</sup> | V <sub>Tot</sub> / (cm <sup>3</sup> g <sup>-1</sup> ) <sup>c</sup> | D <sub>av</sub> / (nm) <sup>d</sup> |
|--------------------------|-------------------------------------------------------------------|------------------------------------------------------------------------|--------------------------------------------------------------------|-------------------------------------|
| Mo <sub>2</sub> C@2D-NPC | 110.2                                                             | 362.8                                                                  | 0.234                                                              | 8.5                                 |
| Mo <sub>2</sub> C@NPC    | 72.7                                                              | 194.3                                                                  | 0.193                                                              | 10.6                                |
| com-Mo <sub>2</sub> C    | 21.9                                                              | 46.5                                                                   | 0.053                                                              | 9.7                                 |

<sup>a</sup> Surface area (m<sup>2</sup> g<sup>-1</sup>) calculated from the nitrogen adsorption based on the BET model. <sup>b</sup> Surface area (m<sup>2</sup> g<sup>-1</sup>) calculated from the nitrogen adsorption isotherms based on the Langmuir model. <sup>c</sup> The total pore volume (cm<sup>3</sup> g<sup>-1</sup>) calculated at P/P0 = 0.99. <sup>d</sup> Average pore diameter.

**Table S2.** Elemental analysis of C, Mo, N, and O based on XPS analysis

| sample                        | C                          | Mo   | N     | O     |
|-------------------------------|----------------------------|------|-------|-------|
|                               | Element composition (at.%) |      |       |       |
| Mo <sub>2</sub> C@2D-NPC/700  | 60.21                      | 7.90 | 19.26 | 12.63 |
| Mo <sub>2</sub> C@2D-NPC      | 65.79                      | 6.31 | 15.62 | 12.28 |
| Mo <sub>2</sub> C@2D-NPC/1100 | 74.50                      | 6.85 | 12.97 | 5.67  |
| Mo <sub>2</sub> C@NPC         | 72.00                      | 3.25 | 8.68  | 16.07 |

**Table S3.** R<sub>ct</sub> values of prepared Mo<sub>2</sub>C-based samples.

| sample                        | R <sub>ct</sub> |
|-------------------------------|-----------------|
| Mo <sub>2</sub> C@2D-NPC      | 94              |
| Mo <sub>2</sub> C@NPC         | 1412            |
| com-Mo <sub>2</sub> C         | 18740           |
| Mo <sub>2</sub> C@2D-NPC/700  | 188             |
| Mo <sub>2</sub> C@2D-NPC/1100 | 231             |

From the above table, we can see that Mo<sub>2</sub>C@2D-NPC shows the smallest value of R<sub>ct</sub>, which exhibits the fastest electron transfer properties among the samples.

**Table S4.** Comparison of HER performance in alkaline media for Mo<sub>2</sub>C@2D-NPC with other electrocatalysts.

| Catalyst                                           | Current density<br>( <i>j</i> , mA cm <sup>-2</sup> ) | Overpotential at<br>corresponding <i>j</i><br>(mV <i>vs</i> RHE) | Tafel slope<br>(mV dec <sup>-1</sup> ) | Reference        |
|----------------------------------------------------|-------------------------------------------------------|------------------------------------------------------------------|----------------------------------------|------------------|
| MoCx nano-<br>octahedrons                          | 10                                                    | 151                                                              | 59                                     | 3                |
| Mo <sub>2</sub> C@NC                               | 10                                                    | 60                                                               | /                                      | 4                |
| Mo <sub>2</sub> C<br>nanotubes                     | 10                                                    | 112                                                              | 55                                     | 5                |
| MoP                                                | 10                                                    | 130                                                              | 48                                     | 6                |
| CoP nanowire<br>arrays                             | 10                                                    | 209                                                              | 129                                    | 7                |
| MoB                                                | 20                                                    | 250                                                              | 59                                     | 8                |
| Ni <sub>3</sub> S <sub>2</sub> /nickel<br>foam     | 10                                                    | 223                                                              | /                                      | 9                |
| Nanocrystalli<br>ne Ni <sub>5</sub> P <sub>4</sub> | 10                                                    | 50                                                               | /                                      | 10               |
| N,P/<br>Mo <sub>2</sub> C@C                        | 10                                                    | 47                                                               | 71                                     | 11               |
| Mo <sub>2</sub> C@NCF                              | 10                                                    | 100                                                              | 65                                     | 12               |
| <b>Mo<sub>2</sub>C@2D-<br/>NPC</b>                 | <b>10<br/>20</b>                                      | <b>45<br/>62</b>                                                 | <b>46</b>                              | <b>This work</b> |

**Table S5.** Comparison of HER performance in acid media for Mo<sub>2</sub>C@2D-NPC with other molybdenum carbide based electrocatalysts.

| Catalyst                      | Current density<br>( <i>j</i> , mA cm <sup>-2</sup> ) | Overpotential at<br>corresponding <i>j</i><br>(mV vs RHE) | Tafel slope<br>(mV dec <sup>-1</sup> ) | Reference        |
|-------------------------------|-------------------------------------------------------|-----------------------------------------------------------|----------------------------------------|------------------|
| MoCx nano-octahedrons         | 10                                                    | 142                                                       | 53                                     | 3                |
| Mo <sub>2</sub> C@NC          | 10                                                    | 124                                                       | 60                                     | 4                |
| Mo <sub>2</sub> C nanotubes   | 10                                                    | 172                                                       | 62                                     | 5                |
| N,P/<br>Mo <sub>2</sub> C@C   | 10                                                    | 141                                                       | 58                                     | 11               |
| Mo <sub>2</sub> C@NCF         | 10                                                    | 144                                                       | 55                                     | 12               |
| Mo <sub>2</sub> C/CNT         | 10                                                    | 152                                                       | 65                                     | 13               |
| Mo <sub>2</sub> C nanowires   | 60                                                    | 200                                                       | 53                                     | 14               |
| Co-Mo <sub>2</sub> C          | 10                                                    | 140                                                       | 39                                     | 15               |
| MoCN                          | 10                                                    | 140                                                       | 46                                     | 16               |
| <b>Mo<sub>2</sub>C@2D-NPC</b> | <b>10</b><br><b>20</b>                                | <b>86</b><br><b>105</b>                                   | <b>62</b>                              | <b>This work</b> |

Reference:

- (1) Wang, D.; Wang, Z.; Wang, C.; Zhou, P.; Wu, Z.; Liu, Z. Distorted MoS<sub>2</sub> Nanostructures: An Efficient Catalyst for the Electrochemical Hydrogen Evolution Reaction. *Electrochem. Commun.* **2013**, *34*, 219-222.
- (2) Eckert, R.; Felderhoff, M.; Schüth, F. Preferential Carbon Monoxide Oxidation over Copper-Based Catalysts under *In situ* Ball Milling. *Angew. Chem., Int. Ed.* **2017**, *129*, 2485-2488.
- (3) Wu, H. B.; Xia, B. Y.; Yu, L.; Yu, X.-Y.; Lou, X. W. D. Porous Molybdenum Carbide Nano-Octahedrons Synthesized *via* Confined Carburization in Metal-Organic Frameworks for Efficient Hydrogen Production. *Nat. Commun.* **2015**, *6*, 6512.
- (4) Liu, Y.; Yu, G.; Li, G. D.; Sun, Y.; Asefa, T.; Chen, W.; Zou, X. Coupling Mo<sub>2</sub>C with Nitrogen-Rich Nanocarbon Leads to Efficient Hydrogen-Evolution Electrocatalytic Sites. *Angew. Chem., Int. Ed.* **2015**, *54*, 10752-10757.
- (5) Ma, F. X.; Wu, H. B.; Xia, B. Y.; Xu, C. Y.; Lou, X. W. D. Hierarchical  $\beta$ -Mo<sub>2</sub>C Nanotubes Organized by Ultrathin Nanosheets as a Highly Efficient Electrocatalyst for Hydrogen Production. *Angew. Chem., Int. Ed.* **2015**, *54*, 15395-15399.

- (6) Xiao, P.; Sk, M. A.; Thia, L.; Ge, X.; Lim, R. J.; Wang, J.-Y.; Lim, K. H.; Wang, X. Molybdenum Phosphide as an Efficient Electrocatalyst for the Hydrogen Evolution Reaction. *Energy Environ. Sci.* **2014**, *7*, 2624-2629.
- (7) Tian, J.; Liu, Q.; Asiri, A. M.; Sun, X. Self-Supported Nanoporous Cobalt Phosphide Nanowire Arrays: an Efficient 3D Hydrogen-Evolving Cathode over the Wide Range of pH 0-14. *J. Am. Chem. Soc.* **2014**, *136*, 7587-7590.
- (8) Vrubel, H.; Hu, X. Molybdenum Boride and Carbide Catalyze Hydrogen Evolution in Both Acidic and Basic Solutions. *Angew. Chem., Int. Ed.* **2012**, *124*, 12875-12878.
- (9) Feng, L.-L.; Yu, G.; Wu, Y.; Li, G.-D.; Li, H.; Sun, Y.; Asefa, T.; Chen, W.; Zou, X. High-Index Faceted Ni<sub>3</sub>S<sub>2</sub> Nanosheet Arrays as Highly Active and Ultrastable Electrocatalysts for Water Splitting. *J. Am. Chem. Soc.* **2015**, *137*, 14023-14026.
- (10) Laursen, A.; Patraju, K.; Whitaker, M.; Retuerto, M.; Sarkar, T.; Yao, N.; Ramanujachary, K.; Greenblatt, M.; Dismukes, G. C. Nanocrystalline Ni<sub>5</sub>P<sub>4</sub>: a Hydrogen Evolution Electrocatalyst of Exceptional Efficiency in Both Alkaline and Acidic Media. *Energy Environ. Sci.* **2015**, *8*, 1027-1034.
- (11) Chen, Y.-Y.; Zhang, Y.; Jiang, W.-J.; Zhang, X.; Dai, Z.; Wan, L.-J.; Hu, J.-S. Pomegranate-like N, P-Doped Mo<sub>2</sub>C@C Nanospheres as Highly Active Electrocatalysts for Alkaline Hydrogen Evolution. *ACS Nano* **2016**, *10*, 8851-8860.
- (12) Huang, Y.; Gong, Q.; Song, X.; Feng, K.; Nie, K.; Zhao, F.; Wang, Y.; Zeng, M.; Zhong, J.; Li, Y. Mo<sub>2</sub>C Nanoparticles Dispersed on Hierarchical Carbon Microflowers for Efficient Electrocatalytic Hydrogen Evolution. *ACS Nano* **2016**, *10*, 11337-11343.
- (13) Chen, W.-F.; Wang, C.-H.; Sasaki, K.; Marinkovic, N.; Xu, W.; Muckerman, J.; Zhu, Y.; Adzic, R. Highly Active and Durable Nanostructured Molybdenum Carbide Electrocatalysts for Hydrogen Production. *Energy Environ. Sci.* **2013**, *6*, 943-951.
- (14) Liao, L.; Wang, S.; Xiao, J.; Bian, X.; Zhang, Y.; Scanlon, M. D.; Hu, X.; Tang, Y.; Liu, B.; Girault, H. H. A Nanoporous Molybdenum Carbide Nanowire as an Electrocatalyst for Hydrogen Evolution Reaction. *Energy Environ. Sci.* **2014**, *7*, 387-392.
- (15) Lin, H.; Liu, N.; Shi, Z.; Guo, Y.; Tang, Y.; Gao, Q. Nanowires: Cobalt-Doping in Molybdenum-Carbide Nanowires Toward Efficient Electrocatalytic Hydrogen Evolution. *Adv. Funct. Mater.* **2016**, *26*, 5581-5581.
- (16) Zhao, Y.; Kamiya, K.; Hashimoto, K.; Nakanishi, S. *In situ* CO<sub>2</sub>-Emission Assisted Synthesis of Molybdenum Carbonitride Nanomaterial as Hydrogen Evolution Electrocatalyst. *J. Am. Chem. Soc.* **2014**, *137*, 110-113.
